# Supplementary material for: Identification of an early-stage Parkinson’s disease neuromarker using event-related potentials, brain network analytics and machine-learning
Source: PubMed Central journal article supplement (PMC8741046; doi:10.1371/journal.pone.0261947), 2022-01-07

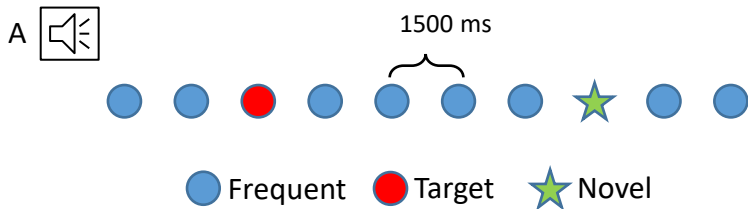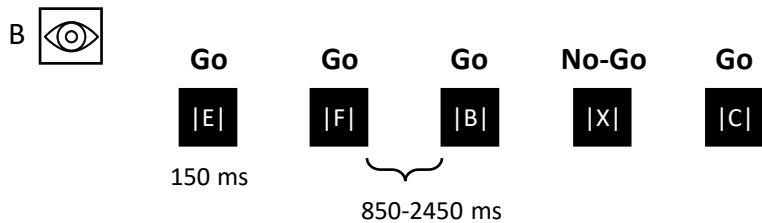

Supplement: pone.0261947.s001.pdf [file pone.0261947.s001.pdf]
