# Supplementary material for: Identification of an early-stage Parkinson’s disease neuromarker using event-related potentials, brain network analytics and machine-learning
Source: PubMed Central journal article supplement (PMC8741046; doi:10.1371/journal.pone.0261947), 2022-01-07
Supplement: pone.0261947.s003.pdf [file pone.0261947.s003.pdf]

**S1 Table. Mean and SD of BNA scores of the five most important neuromarker features**

| Domain                   | Function                                            | Early PD |       | Healthy Control |       |
|--------------------------|-----------------------------------------------------|----------|-------|-----------------|-------|
|                          |                                                     | Mean     | SD    | Mean            | SD    |
| Motor related            | Response-locked activity (Go P-200, Topo)           | 0.67     | 0.20  | 0.81            | 0.13  |
| Early sensory processing | Early sensory processing (Nogo P50, Amplitude)      | 2.00     | 0.45  | 1.43            | 0.65  |
|                          | Early sensory processing (Novel N100, Latency)      | 126.82   | 19.60 | 113.89          | 11.15 |
| Filtering of information | Filtering of information (Frequent P200, Amplitude) | 1.37     | 0.46  | 1.92            | 0.74  |
|                          | Filtering of information (Novel P200, Topo)         | 0.63     | 0.25  | 0.78            | 0.17  |

PD, Parkinson's disease; SD, standard deviation; Topo, topographic similarity.
