# Supplementary material for: Identification of an early-stage Parkinson’s disease neuromarker using event-related potentials, brain network analytics and machine-learning
Source: PubMed Central journal article supplement (PMC8741046; doi:10.1371/journal.pone.0261947), 2022-01-07
Supplement: pone.0261947.s004.pdf [file pone.0261947.s004.pdf]

**S2 Table. Scalp regions used for event related potential variability (ERPv) averaging**

| <b>Area</b>               | <b>Electrodes</b>                        |
|---------------------------|------------------------------------------|
| Left Frontal              | AF3, F5, F3                              |
| Medial Frontal            | AFz, F1, Fz, F2                          |
| Right Frontal             | AF4, F4, F6                              |
| Left Central              | FC5, FC3, C5, C3, CP5, CP3               |
| Medial Central            | FC1, FCz, FC2, C1, Cz, C2, CP1, CPz, CP2 |
| Right Central             | FC4, FC6, C4, C6, CP4, CP6               |
| Left Occipital Parietal   | P7, P5, P3, PO7, PO3, O1                 |
| Medial Occipital Parietal | P1, Pz, P2, POz, Oz                      |
| Right Occipital Parietal  | P4, P6, P8, PO4, PO8, O2                 |
