# Supplementary material for: Identification of an early-stage Parkinson’s disease neuromarker using event-related potentials, brain network analytics and machine-learning
Source: PubMed Central journal article supplement (PMC8741046; doi:10.1371/journal.pone.0261947), 2022-01-07
Supplement: pone.0261947.s006.pdf [file pone.0261947.s006.pdf]

**S4 Table. Physiological explanations of the neuromarker features**

| Feature                                    | ERP Physiological explanation                                                                                                                                                                                                                                                                                                                                                                                                       |
|--------------------------------------------|-------------------------------------------------------------------------------------------------------------------------------------------------------------------------------------------------------------------------------------------------------------------------------------------------------------------------------------------------------------------------------------------------------------------------------------|
| ERPV leftCentral (Response-locked) VGNG    | ERPV reflects the variability of the single trials. It is provided for each of 9 scalp regions (S2_Table; e.g., left central, medial frontal etc.) as the average of the ERPv of the electrodes in that region.                                                                                                                                                                                                                     |
| ERPV leftCentral VGNG                      |                                                                                                                                                                                                                                                                                                                                                                                                                                     |
| ERPV leftFrontal VGNG                      |                                                                                                                                                                                                                                                                                                                                                                                                                                     |
| ERPV medialFrontal VGNG                    |                                                                                                                                                                                                                                                                                                                                                                                                                                     |
| ERPV rightCentral (Response-locked) VGNG   |                                                                                                                                                                                                                                                                                                                                                                                                                                     |
| ERPV rightFrontal VGNG                     |                                                                                                                                                                                                                                                                                                                                                                                                                                     |
| Novel P50 theta Latency AOB                | The P50 ERP component reflects early sensory processing (Pratt, 2011)                                                                                                                                                                                                                                                                                                                                                               |
| No-Go P50 alpha Amplitude VGNG             |                                                                                                                                                                                                                                                                                                                                                                                                                                     |
| Novel N100 alpha Latency AOB               | The N100 ERP component reflects early sensory processing (Pratt, 2011)                                                                                                                                                                                                                                                                                                                                                              |
| Frequent P200 alpha Amplitude AOB          | The P200 ERP component reflects filtering of information                                                                                                                                                                                                                                                                                                                                                                            |
| Frequent P200 alpha Topo AOB               |                                                                                                                                                                                                                                                                                                                                                                                                                                     |
| Novel P200 alpha Topo AOB                  |                                                                                                                                                                                                                                                                                                                                                                                                                                     |
| Novel N2 alpha P-A AOB                     | The N2 ERP component reflects cognitive control and novelty processing (Folstein and Van Petten, 2008).                                                                                                                                                                                                                                                                                                                             |
| Go P300 delta P-A VGNG                     | The classic P300 ERP component as is often elicited by a rare target stimulus in an Oddball task, reflects engagement of attentional resources, stimulus evaluation and classification, working memory and response selection (Polich, 2007, 2012); Similarly, the Go-P300 in the Go/Nogo task reflects "target" processing in the sense it requires a response, including response preparation and execution (Barry et al., 2014). |
| Go P-200 alpha Topo (Response-locked) VGNG | A positivity appearing 200 ms prior to the motor response in the Go condition; since it is locked to the response, it may reflect activity related to motor execution.                                                                                                                                                                                                                                                              |

**References**

- Barry RJ, De Blasio FM, Borchard JP. Sequential processing in the equiprobable auditory Go/NoGo task: children vs. adults. *Clinical Neurophysiology*. 2014 Oct 1;125(10):1995-2006.
- Folstein JR, Van Petten C. Influence of cognitive control and mismatch on the N2 component of the ERP: A review. *Psychophysiology*. 2008;45: 152–170. doi:10.1111/j.1469-8986.2007.00602.x
- Polich J. Updating P300: An integrative theory of P3a and P3b. *Clin Neurophysiol*. 2007;118: 2128–2148. doi:10.1016/j.clinph.2007.04.019
- Polich J. Neuropsychology of P300. In: Luck SJ, Kappenman ES, editors. *The Oxford handbook of event-related potential components*. Oxford University Press; 2012. pp. 159–188.
- Pratt H. Sensory ERP Components. In: Luck SJ, Kappenman ES, editors. *The Oxford Handbook of Event-Related Potential Components*. Oxford university press; 2011. pp. 89–114.
