# Supplementary material for: Identification of an early-stage Parkinson’s disease neuromarker using event-related potentials, brain network analytics and machine-learning
Source: PubMed Central journal article supplement (PMC8741046; doi:10.1371/journal.pone.0261947), 2022-01-07
Supplement: pone.0261947.s007.pdf [file pone.0261947.s007.pdf]

**S5 Table. Demographic and clinical characteristics of the established PD group**

|                                                 |             |
|-------------------------------------------------|-------------|
| Number of participants                          | 20          |
| Males, n (%)                                    | 15 (75)     |
| Mean age, years (SD)                            | 64.2 (8.4)  |
| Mean duration of PD, years (SD)                 | 6.7 (6.3)   |
| Mean Hoehn and Yahr stage (SD)                  | 2.2 (0.6)   |
| Mean Beck Depression Inventory (BDI) score (SD) | 6.9 (4.3)   |
| Mean MMSE score (SD)                            | 28.9 (1.4)  |
| Mean mUPDRS score (SD)                          | 31.8 (10.8) |
| Treatments for PD, number of patients (%)       |             |
| Levodopa                                        | 17 (85)     |
| Monoamine oxidase inhibitor                     | 18 (90)     |
| Dopamine agonist                                | 11 (55)     |
| Amantadine                                      | 7 (35)      |
| Anticholinergic agent                           | 1 (5)       |

SD, standard deviation; BDI- Beck Depression Inventory; MMSE, mini mental status scale; mUPDRS, motor examination (part III) score of the Unified Parkinson's Disease Rating Scale.
